# Supplementary material
Source: publisher site journal article supplement (https://www.dovepress.com/article/432835)
Supplement: Supplementary file 1 [file get_supplementary_file.php]

## Appendix 1: LCA syntax in Mplus

```
TITLE:      Latent Class Analysis;
DATA:      FILE IS C:\Users\aaahmed1\Desktop\HRBS\2018\data.dat;
VARIABLE:
Names = randid wt Q40A Q40C Q41_1 Q41_2 Q41_4 Q43A Q43B Q43C Q1MH
        Q2MH Q3MH Q4MH Q1S Q2S Q3S Q4S Q1D Q2D Q3D Q4D PTSD K6;

Usevariables = Q40A Q40C Q41_1 Q41_2 Q41_4 Q43A Q43B Q43C
        Q1MH Q2MH Q1S Q2S Q3S Q4S Q1D Q2D Q3D Q4D PTSD K6;

Categorical = Q40A Q40C Q41_1 Q41_2 Q41_4 Q43A Q43B Q43C
        Q1MH Q2MH Q1S Q2S Q3S Q4S Q1D Q2D Q3D Q4D;

Classes = c(5);
Weight= wt;
Missing are all (-7);

ANALYSIS:

Type=mixture;
Estimator = MLR;
Starts      = 1000 100;
Stiterations = 50;

PLOT:
Type is plot3;
series is Q40A (1) Q40C (2) Q41_1 (3) Q41_2 (4) Q41_4 (5) Q43A (6)
        Q43B (7) Q43C (8) Q1MH (9) Q2MH (10) Q1S (11) Q2S (12) Q3S (13)
        Q4S (14) Q1D (15) Q2D (16) Q3D (17) Q4D (18) ;

OUTPUT: TECH11;

SAVEDATA:
        file is Outputdata.txt;
        save is cprob;
        format is free;
```
